# Supplementary material for: Anisotropic ionic transport-controlled synaptic weight update by protonation in a VO2 transistor
Source: Royal Society of Chemistry journal article supplement (doi:10.1039/d0tc05628f), 2021-01-01
Supplement: d0tc05628f1.pdf [file d0tc05628f1.pdf]

*Supplementary information for*

**Anisotropic ionic transport-controlled synaptic weight update by protonation  
in VO<sub>2</sub> transistor**

Jaeseoung Park<sup>1</sup>, Chadol Oh<sup>1</sup> and Junwoo Son<sup>1,a)</sup>

<sup>1</sup> Department of Materials Science and Engineering, Pohang University of Science and  
Technology (POSTECH), Pohang 37673, Republic of Korea

a) [jwson@postech.ac.kr](mailto:jwson@postech.ac.kr)

**Figure S1**

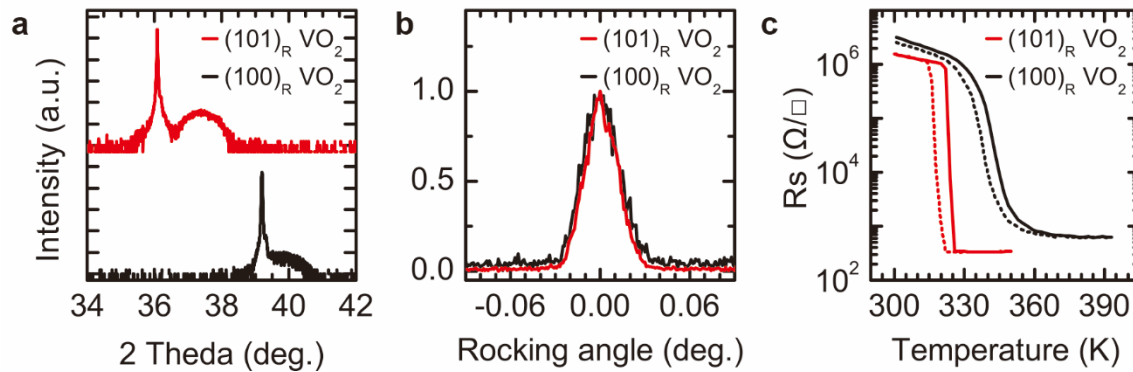

**Figure S1 | Epitaxial growth of  $(101)_R$  and  $(100)_R$   $\text{VO}_2$  thin films.** **a.** Structural analysis of epitaxial  $(101)_R$  and  $(100)_R$   $\text{VO}_2$  films on  $(101)$  and  $(100)$   $\text{TiO}_2$  substrates. **b.** The rocking curves of both  $\text{VO}_2$  diffraction peaks were shown, and they show similar FWHM value as  $0.025^\circ$ . **c.** Sheet resistance ( $R_s$ ) – Temperature (K) measurements from 300 K to 395 K during heating and cooling process of both  $\text{VO}_2$  films. They show similar  $R_s$  change during their intrinsic metal-insulator transition (MIT) phenomena.

**Figure S2**

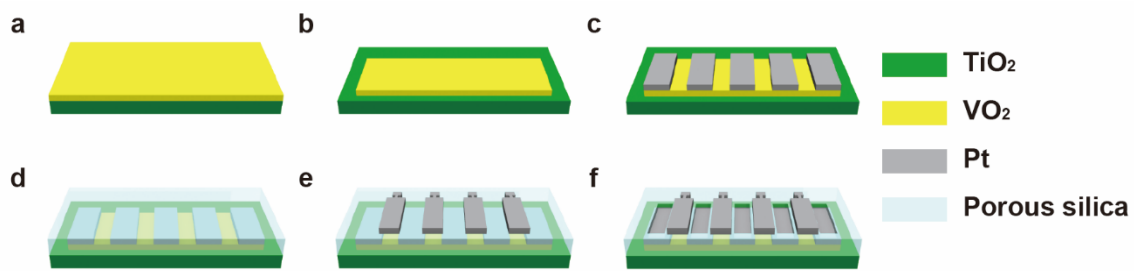

**Figure S2 | Device fabrication process.** **a.** Epitaxial 10-nm-thick (101)<sub>R</sub> and (100)<sub>R</sub> VO<sub>2</sub> thin films were prepared by PLD methods. **b.** VO<sub>2</sub> channel were defined by photolithography followed by wet HNO<sub>3</sub> etching process. **c.** 30-nm-thick Pt source and drain electrodes were deposited by RF sputtering. **d.** 300-nm-thick porous silica layer were spin-coated followed by curing process. **e.** 30-nm-thick Pt gate electrode were deposited by RF sputtering. **f.** The porous silica layer on the area of source and drain electrode were wet etched with oxide etchant for contact.

**Figure S3**

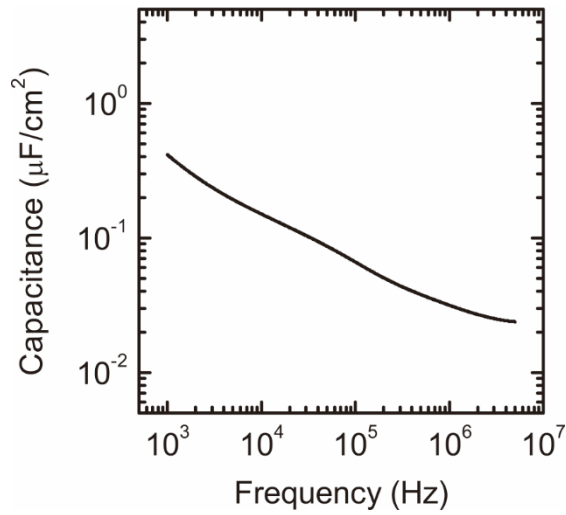

**Figure S3 | Specific capacitance as a function of frequencies.** The frequency-dependent capacitance measurements ( $C-f$ ,  $1 \text{ kHz} \leq f \leq 5 \text{ MHz}$ ) were performed on the Pt (gate)/electrolyte/ $\text{VO}_2$  stack. the specific capacitance decreased with  $f$  ( $\sim 0.4 \text{ } \mu\text{F}/\text{cm}^2$  at  $1 \text{ kHz} \rightarrow \sim 0.02 \text{ } \mu\text{F}/\text{cm}^2$  at  $5 \text{ MHz}$ ) due to the slow response of mobile protons in porous silica with respect to high- $fV_G$ .

**Figure S4**

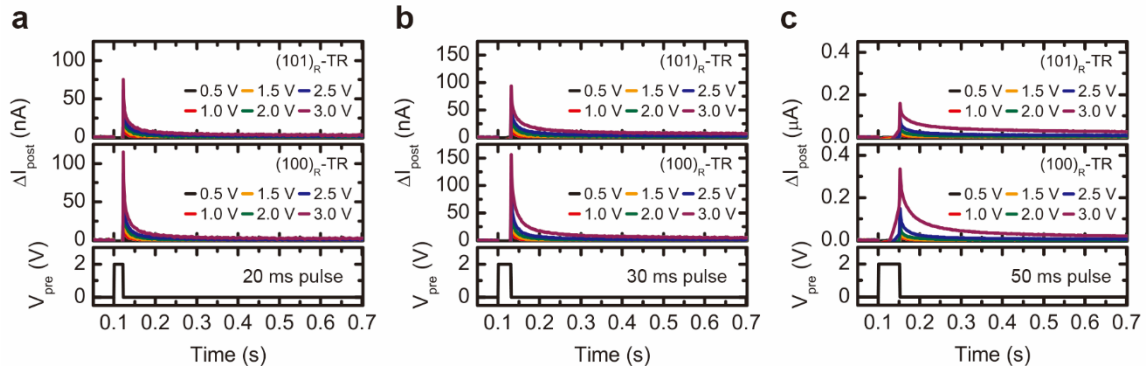

**Figure S4 | Excitatory postsynaptic current (EPSC) triggered by  $D_p$  (= 20, 30, and 50 ms) of  $V_{pre}$  pulse as a function of  $A_p$  of  $V_{pre}$  in  $(101)_R$  and  $(100)_R$ -VO<sub>2</sub> synaptic transistors.**

**Figure S5**

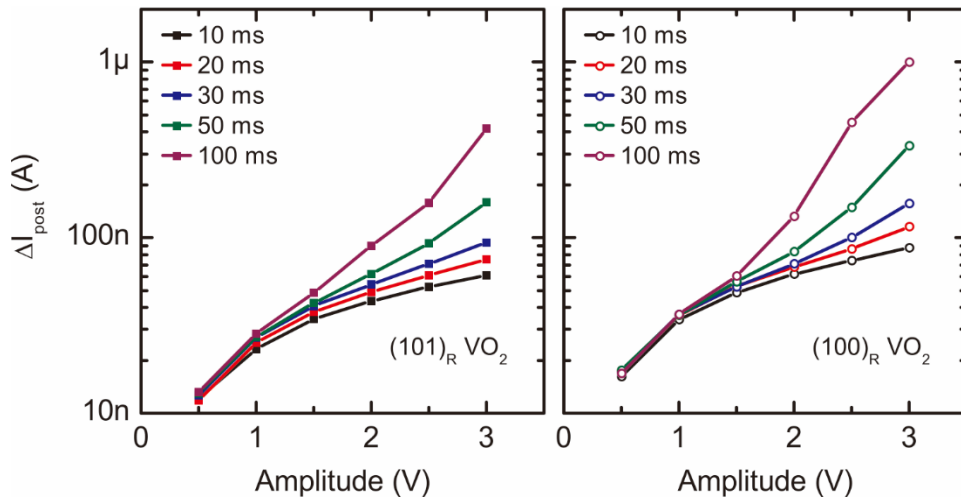

**Figure S5 | EPSC peak of single  $V_{\text{pre}}$  pulse as a function of  $D_P$  and  $A_P$   $(101)_R$  and  $(100)_R\text{-VO}_2$  synaptic transistors.** The similar value of EPSC with short  $D_P$  (= 10 ms) and long  $D_P$  (=100 ms) at small  $A_P$  (= 0.5 V) means that there is no additional  $\text{H}^+$  incorporation with long  $D_P$ . However, the EPSC with short  $D_P$  (= 10 ms) and long  $D_P$  (=100 ms) at large  $A_P$  (= 3.0 V) shows significant differences due to the large amount of  $\text{H}^+$  incorporation in  $\text{VO}_2$  lattices.

**Figure S6**

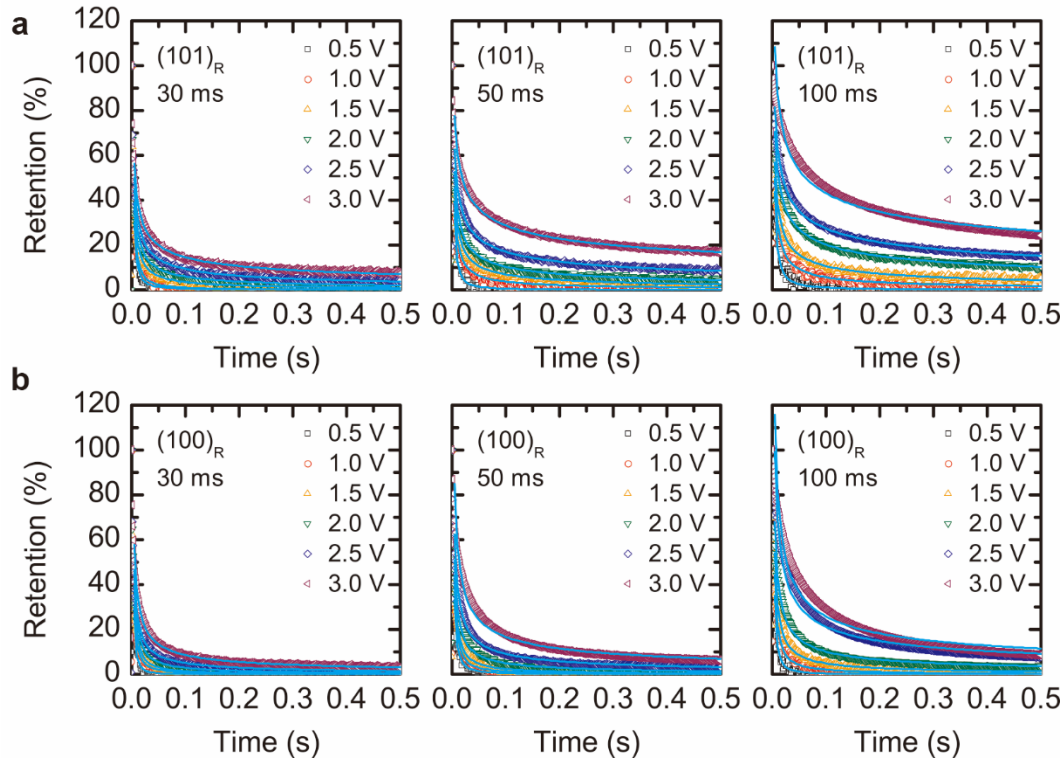

| Pulse width   | 100 ms             |                    | 50 ms              |                    | 30 ms              |                    |
|---------------|--------------------|--------------------|--------------------|--------------------|--------------------|--------------------|
| $V_{pre}$ (V) | (101) <sub>R</sub> | (100) <sub>R</sub> | (101) <sub>R</sub> | (100) <sub>R</sub> | (101) <sub>R</sub> | (100) <sub>R</sub> |
| 3.0 V         | 0.31               | 0.50               | 0.33               | 0.54               | 0.45               | 0.64               |
| 2.5 V         | 0.37               | 0.52               | 0.44               | 0.64               | 0.56               | 0.75               |
| 2.0 V         | 0.42               | 0.64               | 0.54               | 0.78               | 0.68               | 0.91               |
| 1.5 V         | 0.56               | 0.81               | 0.63               | 0.97               | 0.80               | 1.12               |
| 1.0 V         | 0.73               | 1.02               | 0.79               | 1.14               | 1.19               | 1.16               |
| 0.5 V         | 1.24               | 1.48               | 1.38               | 1.38               | 1.35               | 1.74               |

**Figure S6 | The memory retention in the both VO<sub>2</sub> synaptic transistors with  $A_P$  (= 0.5 - 3.0 V) and  $D_P$  (= 30, 50, and 100 ms). The power function  $\gamma = b \times t^{-m}$ , where  $\gamma$  is the memory retention,  $b$  is the initial value,  $t$  is time, and  $m$  is the decay rate. Retention time increases as  $m$  decreases. By quantitative evaluation, in the same transistor,  $m$  decreased with increase in  $A_P$  and  $D_P$ .**

**Figure S7**

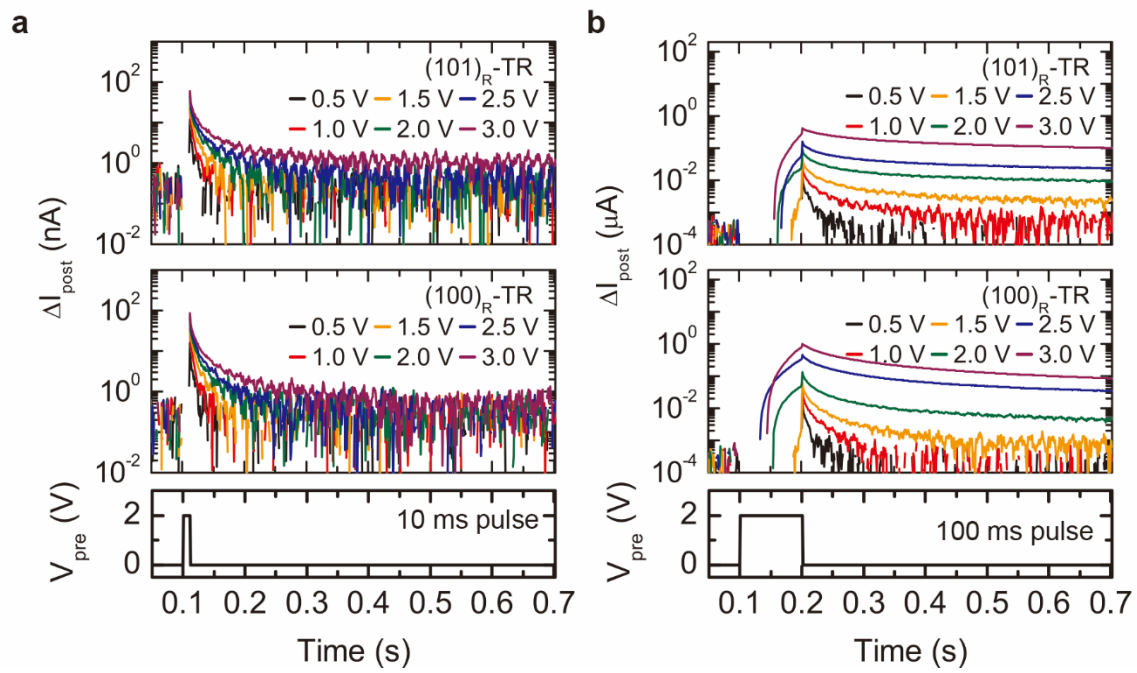

**Figure S7** | **a.** a short  $D_P$  of  $V_{\text{pre}}$  pulse ( $= 10$  ms) and **b.** a long  $D_P$  of  $V_{\text{pre}}$  pulse ( $= 100$  ms) as a function of the  $A_P$  of  $V_{\text{pre}}$  in  $(101)_R$  and  $(100)_R\text{-VO}_2$  synaptic transistors in logarithmic scale.



Figure S8

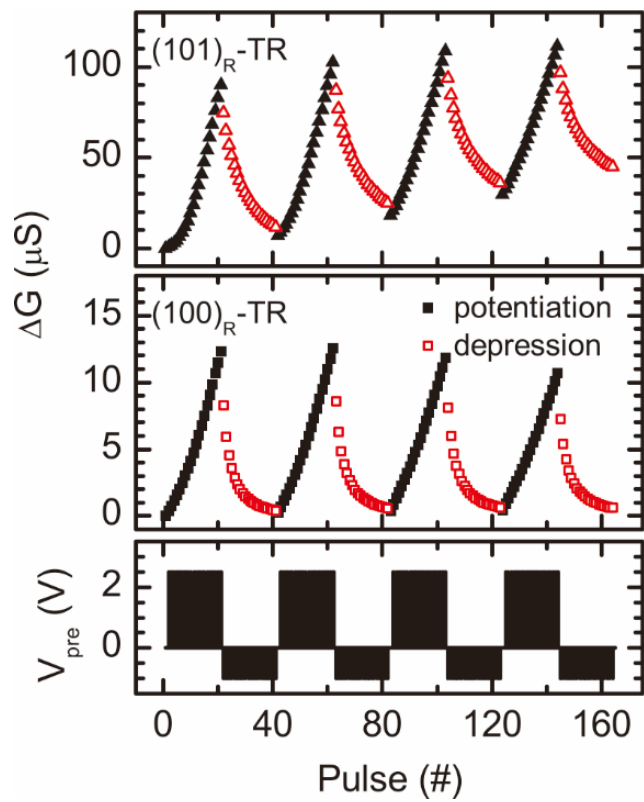

Figure S8 | Potentiation and Depression of  $(101)_R$  and  $(100)_R$   $VO_2$  synaptic transistors

Figure S9

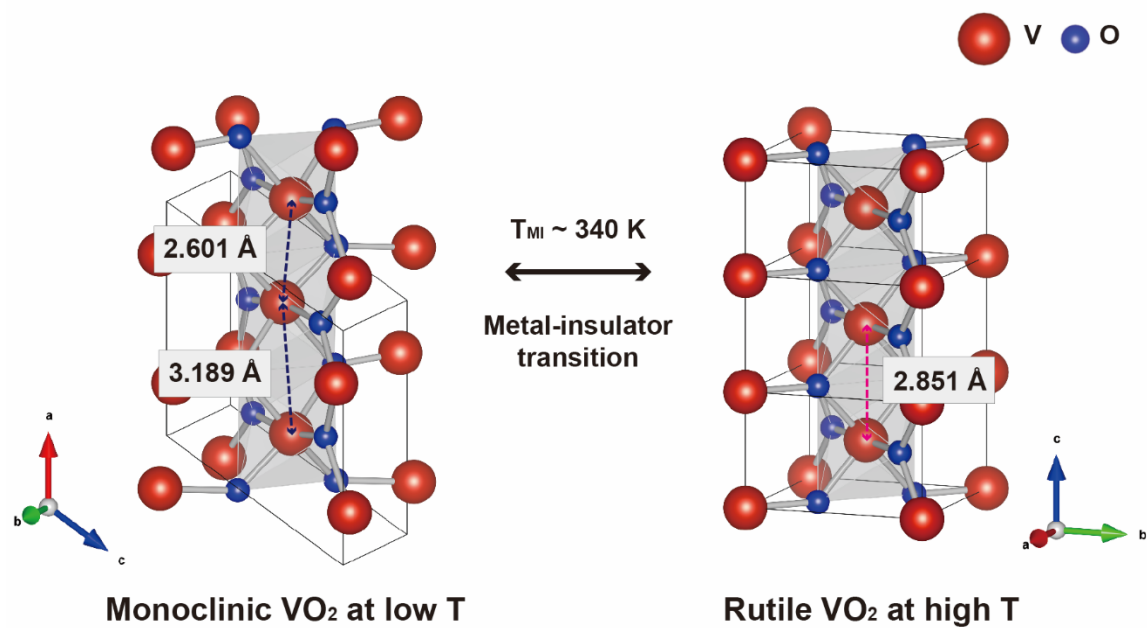

Figure S9 | the crystallographic axes of monoclinic  $\text{VO}_2$  and rutile  $\text{VO}_2$  phases
